# Supplementary material for: Cytoplasmic Colocalization of RXRα and PPARγ as an Independent Negative Prognosticator for Breast Cancer Patients
Source: MDPI journal article supplement (doi:10.3390/cells11071244), 2022-04-06
Supplement: s1 [file s1]

Supplementary Table S1

|                   |                                                                                                                                                                                                                                                                                                                                                                                                                                                                                                                                                                                                        |                                                                                                                                                                                                                                                                                                                                                                                                                                                                                                                                                                                                                                                                                                                               |
|-------------------|--------------------------------------------------------------------------------------------------------------------------------------------------------------------------------------------------------------------------------------------------------------------------------------------------------------------------------------------------------------------------------------------------------------------------------------------------------------------------------------------------------------------------------------------------------------------------------------------------------|-------------------------------------------------------------------------------------------------------------------------------------------------------------------------------------------------------------------------------------------------------------------------------------------------------------------------------------------------------------------------------------------------------------------------------------------------------------------------------------------------------------------------------------------------------------------------------------------------------------------------------------------------------------------------------------------------------------------------------|
|                   | PPAR $\gamma$                                                                                                                                                                                                                                                                                                                                                                                                                                                                                                                                                                                          | RXR $\alpha$                                                                                                                                                                                                                                                                                                                                                                                                                                                                                                                                                                                                                                                                                                                  |
| Positive controls | 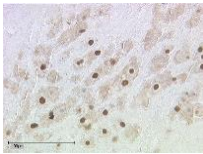 Placenta                                                                                                                                                                                                                                                                                                                                                                                                                                                                                                             |  Placenta                                                                                                                                                                                                                                                                                                                                                                                                                                                                                                                                                                                                                                   |
| Negative controls |  Placenta                                                                                                                                                                                                                                                                                                                                                                                                                                                                                                             |  Placenta                                                                                                                                                                                                                                                                                                                                                                                                                                                                                                                                                                                                                                   |
| materials         | <p><b>Primary antibody:</b><br/>Anti-PPAR gamma; Rabbit IgG polyclonal. Conc: 1mg/ml<br/>Company: Abcam<br/>Order number: ab59256</p> <p><b>Detection System:</b><br/>ZytoChem Plus HRP Polymer System (Mouse/Rabbit) (Zytomed; No. POLHRP-100)</p> <p><b>Chromogen Substrate Solution:</b><br/>Liquid DAB+ Substrate Chromogen System (Dako; Order No. K3468).</p>                                                                                                                                                                                                                                    | <p><b>Primary antibody:</b><br/>Anti RxR alpha; clone K8508 (mouse IgG2a); Conc: 1 mg/ml.<br/>Company: Perseus Proteomics<br/>Order number: PP-K8508-10</p> <p><b>Detection system:</b><br/>Vectastain Elite mouse -IgG kit (Linaris; No.PK-6102).</p> <p><b>Chromogen Substrate Solution:</b><br/>Liquid DAB+ Substrate Chromogen System (Dako; Order No.K3468).</p>                                                                                                                                                                                                                                                                                                                                                         |
| Staining Protocol | <ol style="list-style-type: none"><li>1. Deparaffinize in xylene</li><li>2. Blocking: <b>20 min in 3% H<sub>2</sub>O<sub>2</sub> in methanol.</b></li><li>3. Demask by heat pretreatment in pressure cooker with sodium citrate buffer pH 6.0</li><li>4. 5 min <b>Blocking Solution.</b></li><li>5. <b>primary antibody</b> 16h overnight at 4°C; dilution: 1:100 in PBS</li><li>6. <b>30 min HRP polymer</b></li><li>7. <b>30 sec. substrate staining with DAB</b></li><li>8. <b>2 min. counterstaining</b></li><li>9. <b>bluing for 5 min in tap water</b></li><li>10. cover with "Eukitt"</li></ol> | <ol style="list-style-type: none"><li>1. Deparaffinize in xylene</li><li>2. Blocking: <b>20 min in 3% H<sub>2</sub>O<sub>2</sub> in methanol.</b></li><li>3. Demask by heat pretreatment in pressure cooker with sodium citrate buffer pH 6.0</li><li>4. <b>3 min. Power Block (BioGenex; No.HK0851008)</b></li><li>5. <b>4°C overnight (16h): primary antibody</b> Dil.: 1:200 in in PBS</li><li>6. <b>30 min secondary antibody</b> = biotinylated Link-Ak, which binds the ABC complex</li><li>7. <b>30 min ABC complex</b></li><li>8. <b>1 min substrate staining with DAB+Chromogen</b></li><li>9. <b>1 min. counterstaining</b></li><li>10. bluing for 3 min in tap water.</li><li>11. Covering with "Eukitt"</li></ol> |
| Staining          | nucleus and cytoplasm                                                                                                                                                                                                                                                                                                                                                                                                                                                                                                                                                                                  | nucleus and cytoplasm                                                                                                                                                                                                                                                                                                                                                                                                                                                                                                                                                                                                                                                                                                         |

## Supplementary Figure 1

A: RXR in normal breast tissue

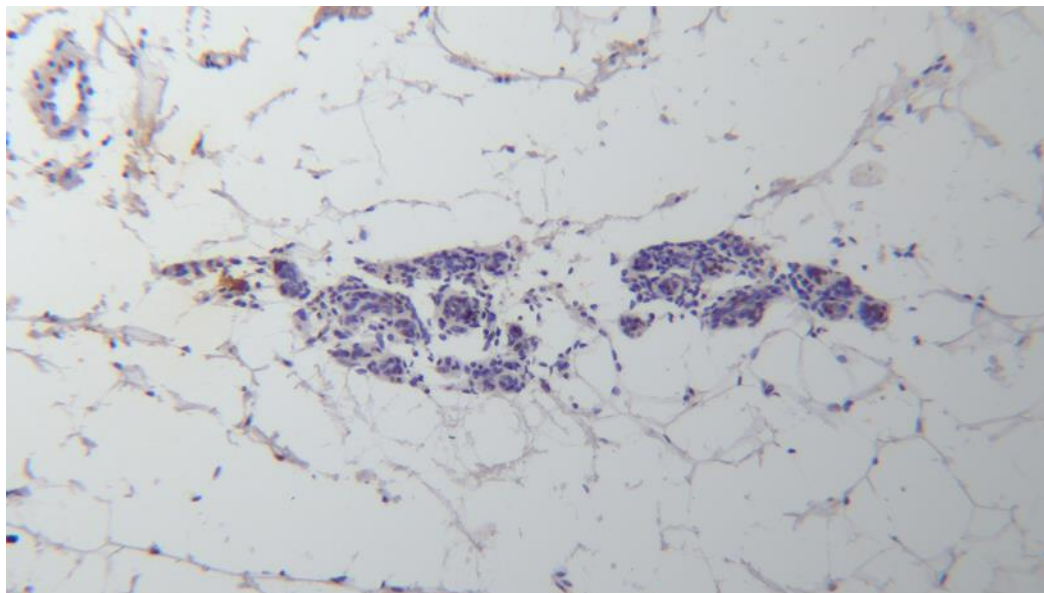

B: PPAR in normal breast tissue

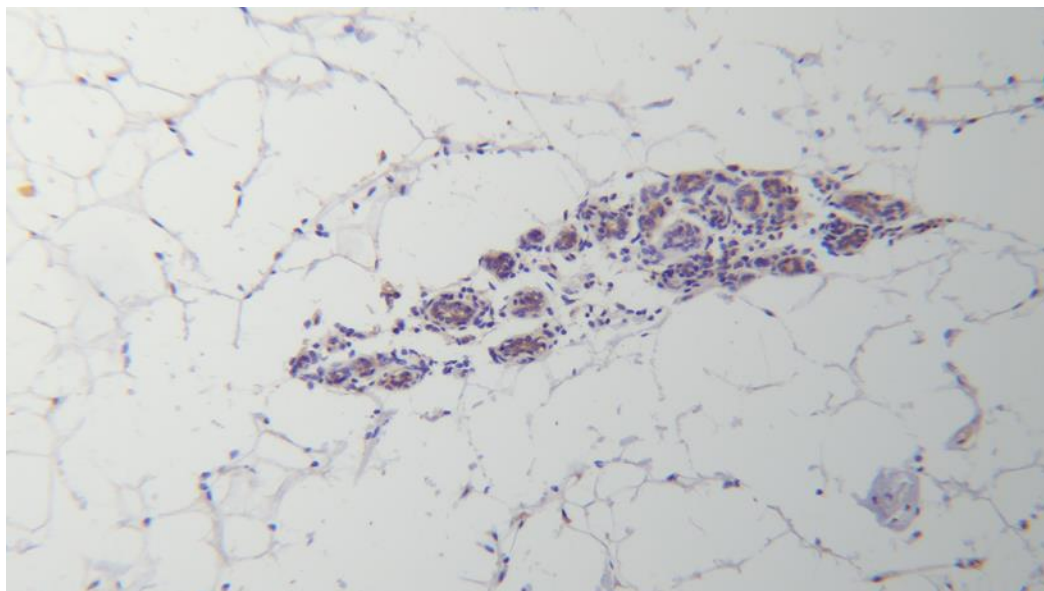

Supplementary figure 2

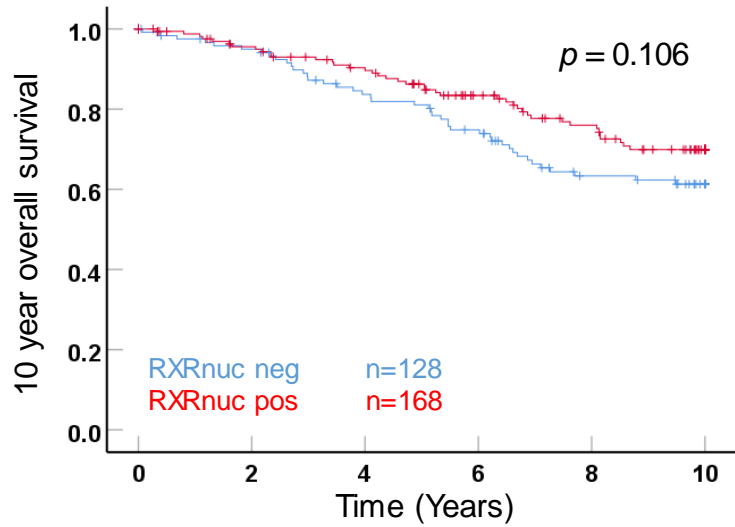

A: Nuclear RXR expression

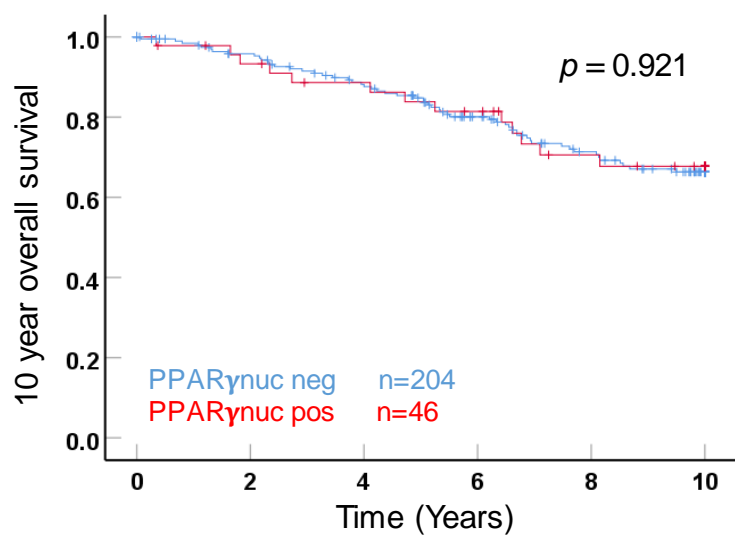

B: Nuclear PPARγ expression

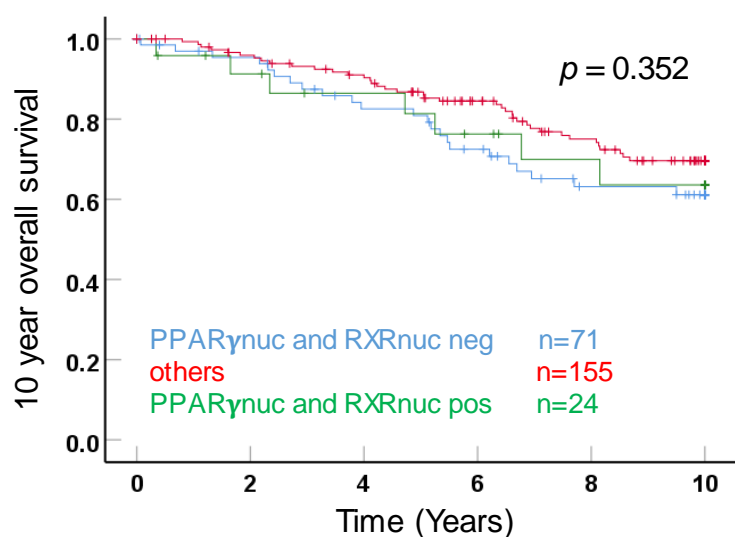

C: Combined Nuclear expression RXR and PPARγ

**Supplementary Table S2 (belonging to Figure 2A).**

| Subgroups          | Total number of cases | Estimate of survival time in years |
|--------------------|-----------------------|------------------------------------|
| PPARg low/RXRneg   | 49                    | 8,817                              |
| PPARg low/RXRpos.  | 70                    | 8,603                              |
| PPARg high/RXRneg. | 46                    | 8,508                              |
| PPARg high/RXRpos. | 85                    | 7,704                              |
| overall            | 250                   | 8,311                              |

**Supplementary Table S3 (belonging to Figure 2B).**

| Subgroups          | Total number of cases | Estimate of survival time in years |
|--------------------|-----------------------|------------------------------------|
| Other cases        | 165                   | 8,64                               |
| PPARg high/RXRpos. | 85                    | 7,704                              |
| overall            | 250                   | 8,311                              |

**Supplementary Table S4 (belonging to Figure 3A).**

| Subgroups          | Total number of cases | Estimate of survival time in years |
|--------------------|-----------------------|------------------------------------|
| PPARg low/RXRneg   | 49                    | 5,299                              |
| PPARg low/RXRpos.  | 70                    | 5,412                              |
| PPARg high/RXRneg. | 46                    | 5,366                              |
| PPARg high/RXRpos. | 85                    | 4,169                              |
| overall            | 250                   | 4,943                              |

**Supplementary Table S5 (belonging to Figure 3B).**

| Subgroups          | Total number of cases | Estimate of survival time in years |
|--------------------|-----------------------|------------------------------------|
| Other cases        | 165                   | 5,36                               |
| PPARg high/RXRpos. | 85                    | 4,169                              |
| overall            | 250                   | 4,943                              |

**Supplementary Table S6 (belonging to Figure 3C).**

| Subgroups          | Total number of cases | Estimate of survival time in years |
|--------------------|-----------------------|------------------------------------|
| Other cases        | 136                   | 5,369                              |
| PPARg high/RXRpos. | 63                    | 4,353                              |
| overall            | 199                   | 5,04                               |

**Supplementary Table S7 (belonging to Figure 3D).**

| Subgroups          | Total number of cases | Estimate of survival time in years |
|--------------------|-----------------------|------------------------------------|
| Other cases        | 82                    | 5,591                              |
| PPARg high/RXRpos. | 33                    | 4,137                              |
| overall            | 115                   | 5,155                              |
